# Supplementary material for: Mucilage-capped silver nanoparticles for glucose electrochemical sensing and fuel cell applications
Source: PubMed Central journal article supplement — RSC Adv. 2020 Oct 14;10(62):37675–82. doi: 10.1039/d0ra07359h (PMC9057116; doi:10.1039/d0ra07359h), 2020-10-14
Supplement: RA-010-D0RA07359H-s001.pdf [file RA-010-D0RA07359H-s001.pdf]

## Supporting Information

### Mucilage-Capped Silver Nanoparticles for Glucose Electrochemical Sensing and Fuel Cell Applications

Ziad Khalifa,<sup>\*a</sup> Moustafa Zahran,<sup>b,c</sup> Magdy A-H Zahran<sup>b</sup> and Magdi Abdel Azzem<sup>b</sup>

<sup>a</sup>*Chemical Engineering Department, Faculty of Engineering, The British University in Egypt, El Sherouk City, 11837, Egypt.*

<sup>b</sup>*Department of Chemistry, Faculty of Science, El-Menoufia University, Shibin El-Kom 32512, Egypt*

<sup>c</sup>*Menoufia Company for Water and Wastewater, Holding Company for Water and Wastewater, Menoufia 32514, Egypt*

\*Corresponding author: [ziad.khalifa@bue.edu.eg](mailto:ziad.khalifa@bue.edu.eg)

**Table S1: Raw data of Figure 8**

| Concentration (mM) | Current (μA) |
|--------------------|--------------|
| 0                  | 0            |
| 0.01               | 0.6          |
| 0.1                | 1.19         |
| 0.2                | 2.93         |
| 0.3                | 3.89         |
| 0.4                | 5.03         |
| 0.5                | 6.06         |
| 0.6                | 8.35         |
| 0.7                | 10.39        |
| 0.8                | 12.34        |
| 0.9                | 14.29        |
| 1                  | 16.21        |
| 1.1                | 18.1         |
| 1.2                | 19.76        |
| 1.3                | 21.43        |
| 1.4                | 23.1         |
| 1.5                | 24.29        |
| 1.6                | 25.72        |
| 1.7                | 26.84        |
| 1.8                | 27.75        |
| 1.9                | 28.83        |
| 2                  | 29.71        |
| 2.1                | 30.67        |
| 2.2                | 31.9         |

**Table S2: Raw data of figure 9**

| <b>Concentration<br/>(mM)</b> | <b>Current<br/>(<math>\mu</math>A)</b> |
|-------------------------------|----------------------------------------|
| 0                             | 4.19                                   |
| 0.1                           | 3.76                                   |
| 0.6                           | 2.54                                   |
| 1.2                           | 1.2                                    |
| 1.6                           | 0.5                                    |
| 1.9                           | 0.27                                   |

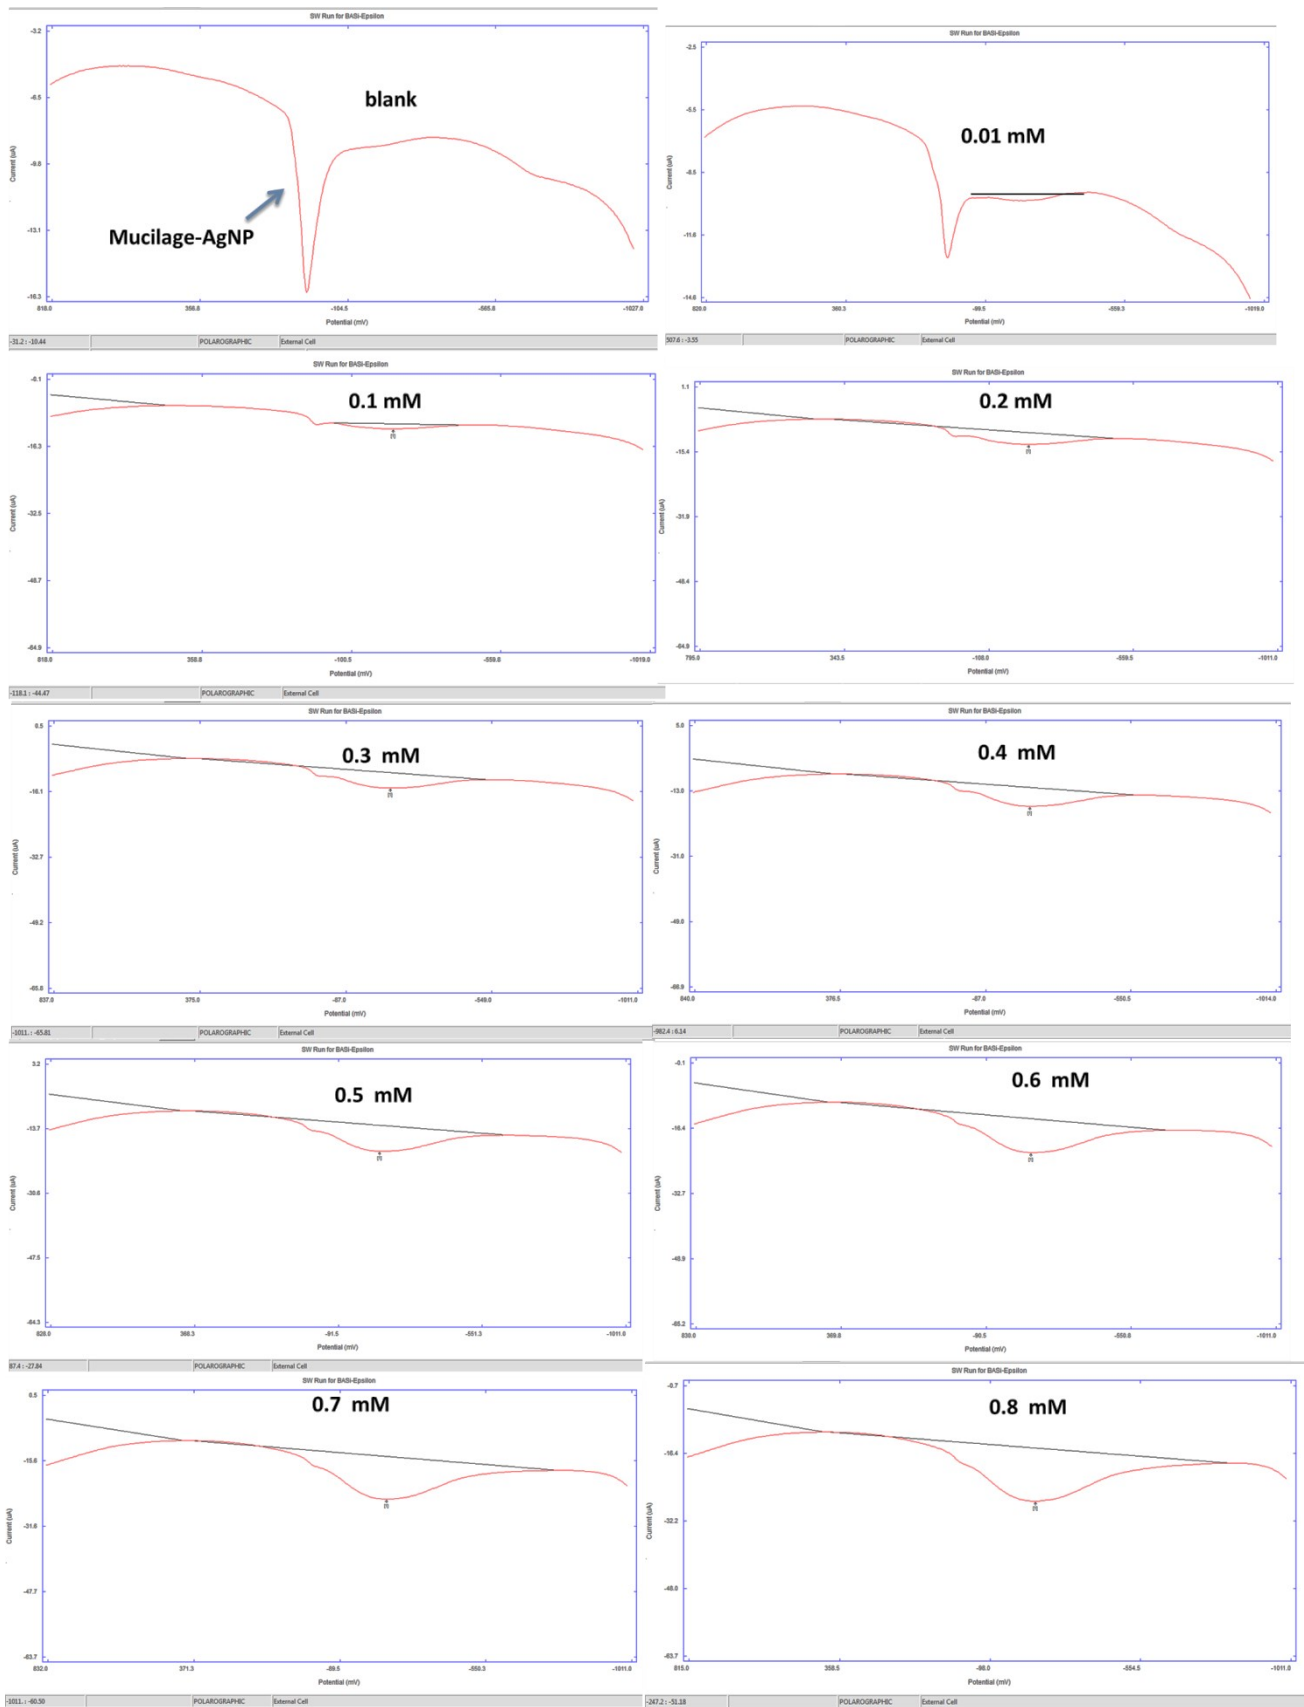

**Figure S1: Square wave voltammograms of 0-2.2 mM glucose oxidized at Mucilage-AgNP/GC (continued on next page)**

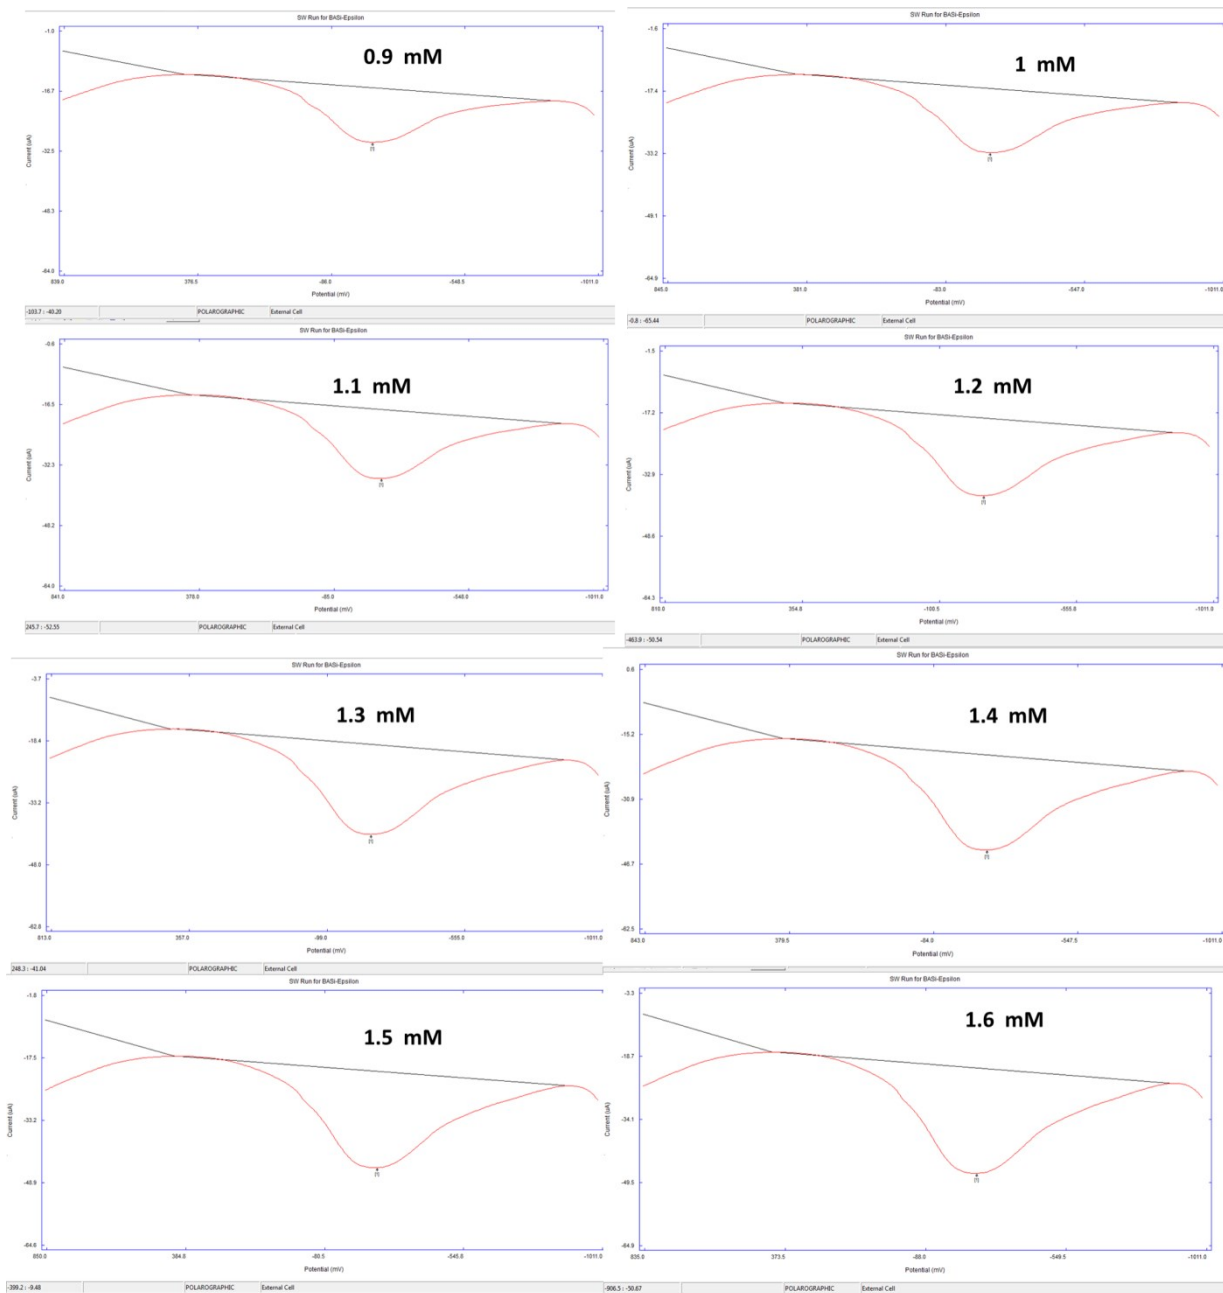

Figure S1 (continued)

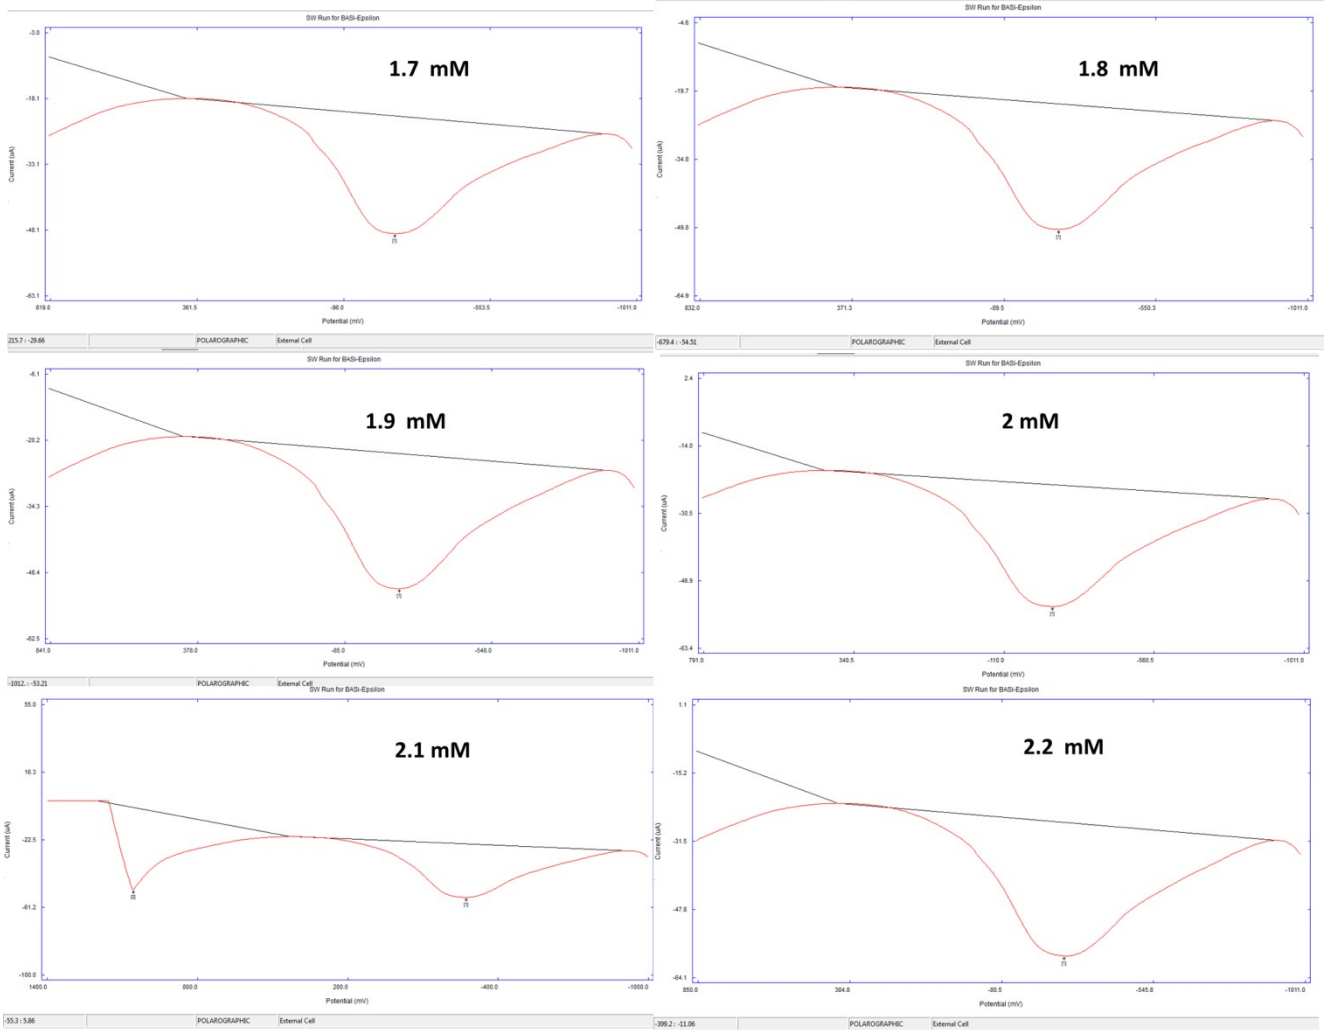

Figure S1 (continued)
